# Supplementary material for: An integrated microfluidic chip for studying the effects of neurotransmitters on neurospheroids
Source: Royal Society of Chemistry journal article supplement (doi:10.1039/d2lc00755j), 2023-01-01
Supplement: d2lc00755j1.pdf [file d2lc00755j1.pdf]

# An integrated microfluidic chip for studying the effects of neurotransmitters on neurospheroids

Subin Mao<sup>1,\*</sup>, Catherine Fonder<sup>2,3,6,\*</sup>, Fazlay Rubby<sup>1,\*</sup>,  
Gregory J. Phillips<sup>5,6</sup>, Donald S. Sakaguchi<sup>2,3,4,6,\*\*</sup>, and Long Que<sup>1,\*\*</sup>

<sup>1</sup>Department of Electrical and Computer Engineering

<sup>2</sup> Molecular, Cellular, and Developmental Biology Program

<sup>3</sup>Department of Genetics, Development and Cell Biology, <sup>4</sup>Neuroscience Program

<sup>5</sup>Department of Veterinary Microbiology, <sup>6</sup>Nanovaccine Institute

Iowa State University, Ames IA 50011, USA

\*Equal contribution

\*\*Correspondence to D. Sakaguchi (Email: [dssakagu@iastate.edu](mailto:dssakagu@iastate.edu)) and L. Que (Email:

[lque@iastate.edu](mailto:lque@iastate.edu))

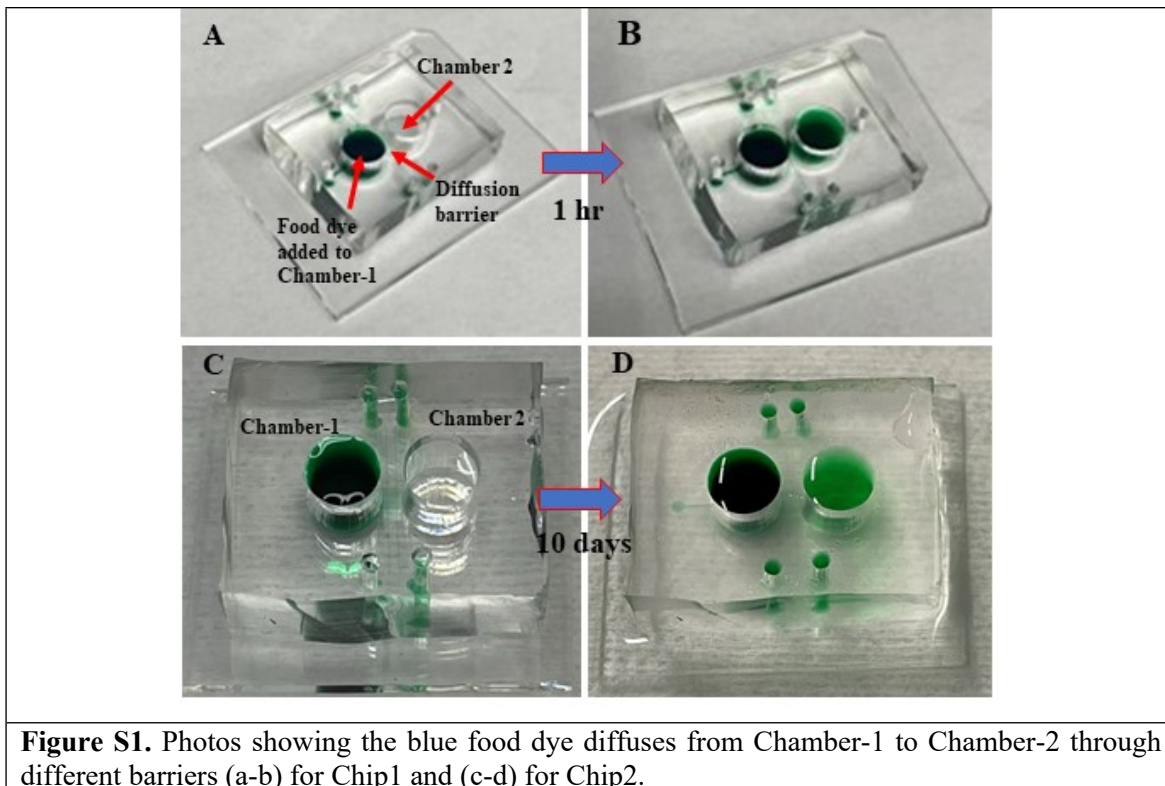

**Figure S1.** Photos showing the blue food dye diffuses from Chamber-1 to Chamber-2 through different barriers (a-b) for Chip1 and (c-d) for Chip2.

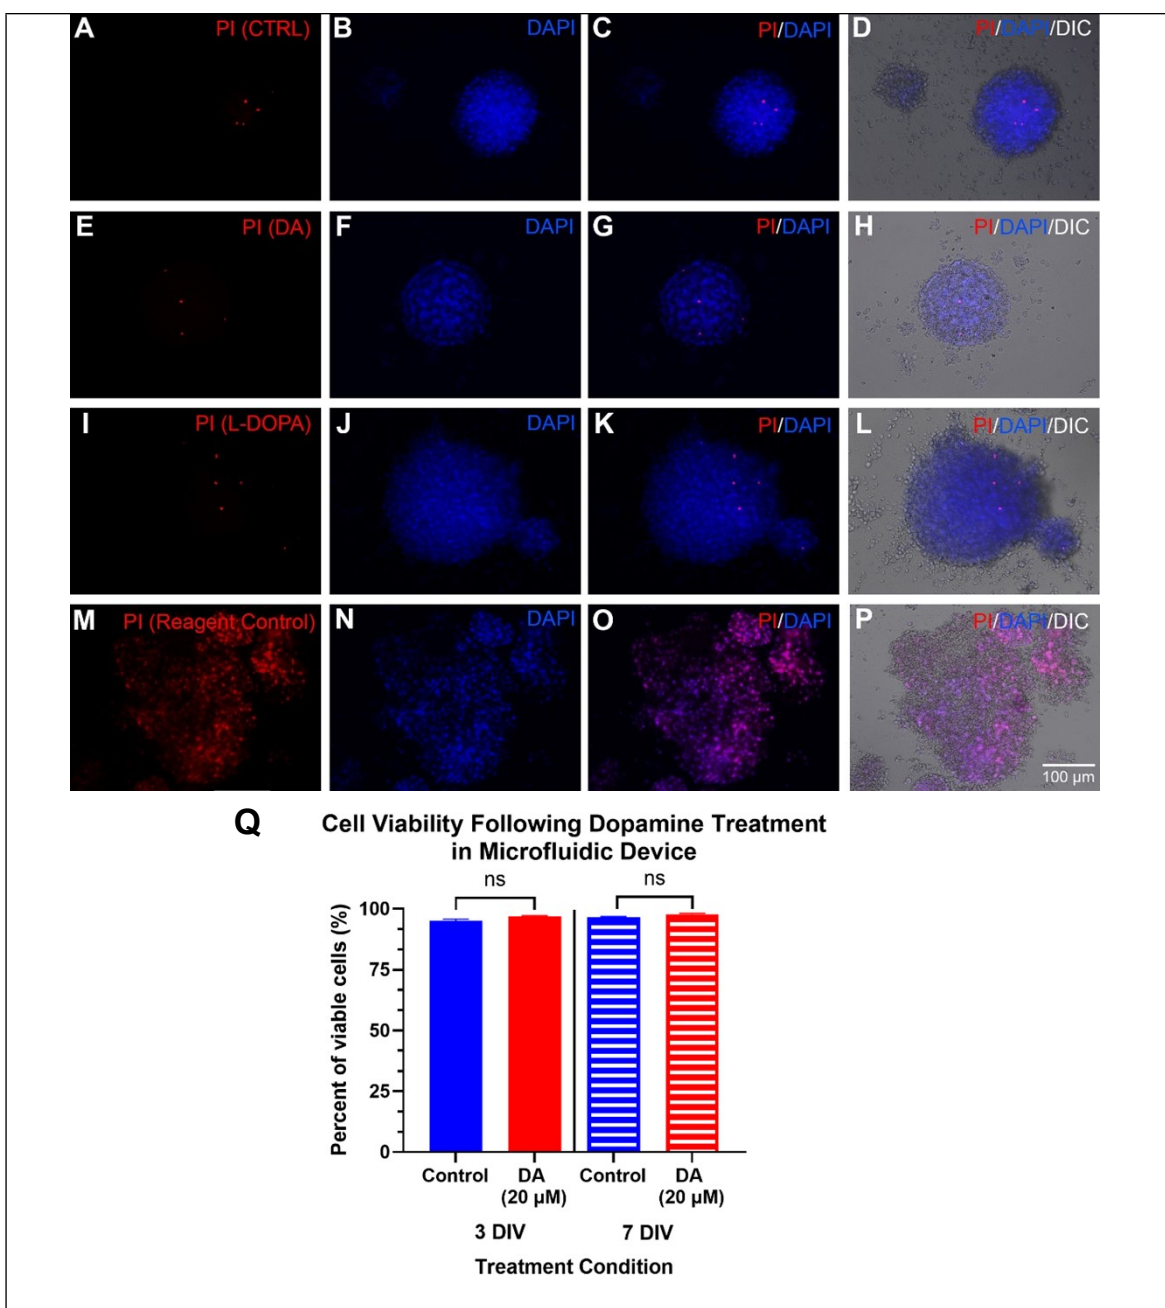

**Figure S2. Viability of AHPC Neurospheroids under DA Treatment in Microfluidic Devices.**

A-P: Fluorescence images of AHPC neurospheroids at 7 DIV following dopamine (DA) treatment in microfluidic devices. Propidium iodide staining of dead cells (PI, red; A, C, D, E, G, H, I, K, L, M, O, and P) and cell nuclei counterstained with DAPI (blue; B, C, D, F, G, H, J, K, L, N, O, and P). Cells intentionally killed with 70% ethanol acted as a positive reagent control for PI staining (M-P). Scale bar = 100 μm. Q: Quantitative analysis of AHPC cell viability following drug treatment within microfluidic devices at 3 and 7 DIV. No significant difference was detected between any of the culture conditions at 3 or 7 DIV, though the DA treated spheres had a slight decrease in the percentage of PI-labeled cells compared to the control group. Bars represent the mean percentage of PI-labeled cells, and the error bars represent the standard error of the mean. N=3 independent experiments, 30-41 images were quantified for each treatment

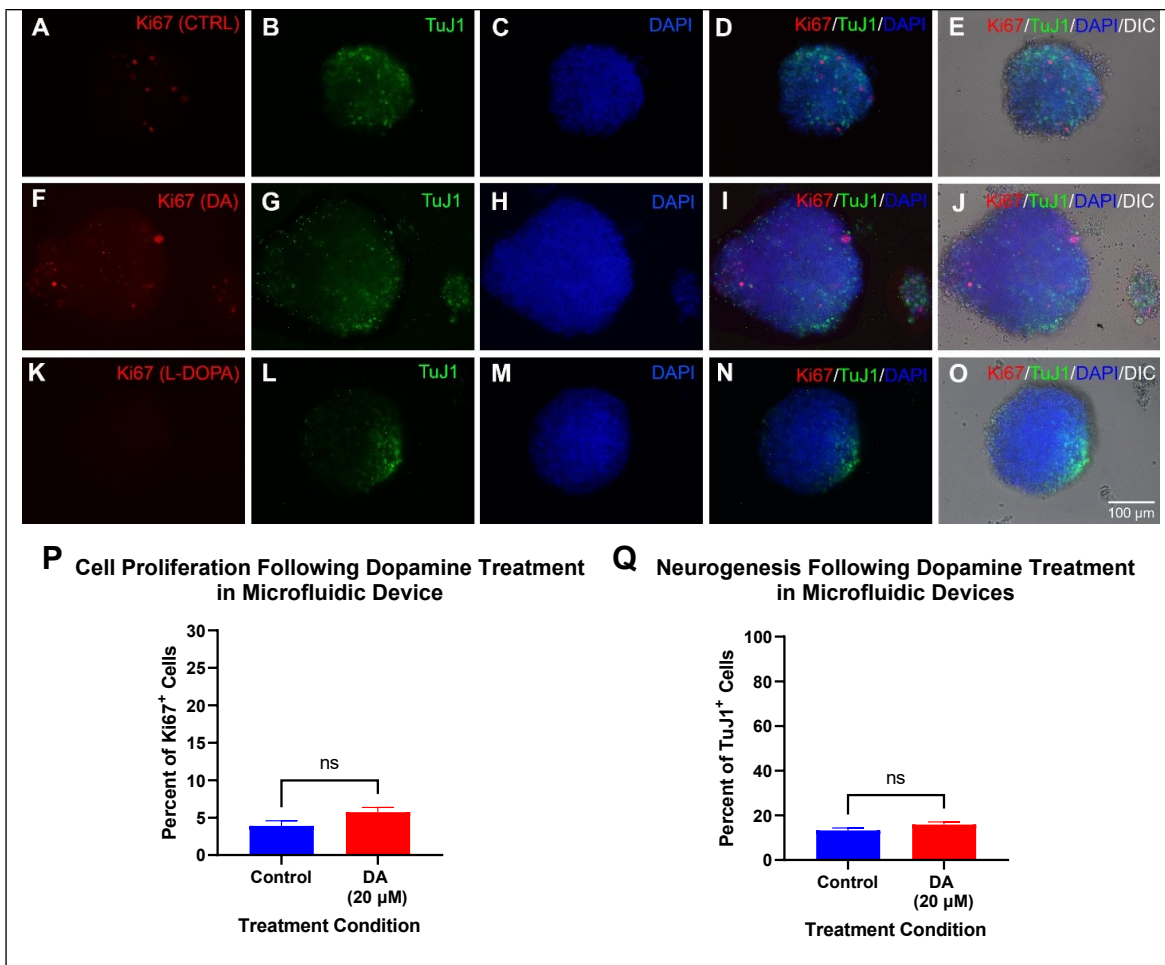

**Figure S3. Proliferation and Differentiation of AHPC Neurospheroids under DA Treatment in Microfluidic Devices.** A-P: Fluorescence images of AHPC neurospheroids at 7 DIV following dopamine treatment in microfluidic devices. Cells were immunolabeled with cell proliferation marker (Ki67, red; A, D, E, F, I, J, K, N, and O), immature neuron marker (TuJ1, green; B, D, E, G, I, J, L, N, and O), and cell nuclei marker (DAPI, blue; C, D, E, H, I, J, M, N, and O). Scale bar = 100  $\mu$ m. P-Q: Quantitative analysis of AHPC cell proliferation and differentiation following drug treatment within microfluidic devices at 7 DIV. P: There was a small, yet non-significant increase in the percent of Ki67-labeled cells following DA treatment compared to the control. Q: A slight increase in neurogenesis was observed following DA treatment compared to the control as shown by the slight increase in the percent of TuJ1-labeled cells; however, the DA treated group was not significantly different from the control group. Bars represent the mean percentage of PI-labeled cells, and the error bars represent the standard error of the mean. N=3 independent experiments, 24-29 images were quantified for each treatment condition.

**Table S1.** Estimated sizes of Green Food Dye (Fast Green FCF), Dopamine and Serotonin

| Chemical Name  | Formula                        | Molar Mass                             | Density               | Molecule volume                   |
|----------------|--------------------------------|----------------------------------------|-----------------------|-----------------------------------|
| Fast Green FCF | $C_{37}H_{34}N_2Na_2O_{10}S_3$ | $808.84 \text{ g}\cdot\text{mol}^{-1}$ | $0.35 \text{ g/cm}^3$ | $372\times 10^{-23} \text{ cm}^3$ |
| Dopamine       | $C_8H_{11}NO_2$                | $189.64 \text{ g}\cdot\text{mol}^{-1}$ | $1.2 \text{ g/cm}^3$  | $26\times 10^{-23} \text{ cm}^3$  |
| Serotonin      | $C_{10}H_{12}N_2O$             | $212.68 \text{ g}\cdot\text{mol}^{-1}$ | $1.3 \text{ g/cm}^3$  | $27\times 10^{-23} \text{ cm}^3$  |

Molar volume is  $V_m = M/\rho$

Volume of molecule is  $V_{\text{molecule}} = V_m/N_A$

M is the molar mass and  $\rho$  is the density

$V_{\text{molecule}}$  is the volume of the molecule,

$N_A$  is Avogadro constant ( $6.02214076\times 10^{23} \text{ mol}^{-1}$ ).
